# Supplementary material for: Identification of a protein expression signature distinguishing early from organising diffuse alveolar damage in COVID-19 patients
Source: J Clin Pathol. 2023 Mar 9;76(8):561–5. doi: 10.1136/jcp-2023-208771 (PMC10423525; doi:10.1136/jcp-2023-208771)
Supplement: Supplementary data [file jcp-2023-208771supp001.xlsx]

## Sheet: log2 counts per ROI
Scan_ID	ROI_ID	Cohort	Path	Patient	Wave - First (F) or Second (S)	Ethnicity (White (W) or BAME (B))	Age Category (Cat A ≤60, Cat B 61-70, Cat C 71-80, Cat D ≥ 80)	Sex (M/F)	Illness duration - Early (≤15 days between symptom onset and death - E) or Late (>15 days) between symptom onset and death - L) or Unknown (U)	Place of death - Community (C) or Hospital (H)	Exposure to steroids (0, no; 1, yes; U, unknown)	Exposure to antibiotics (0, no; 1,yes; U, unknown)	Exposure to anticoagulants (0, no; 1, yes; U, unknown)	Time of death to post mortem (days)	CD68	CD45	PD-L1	S6	Beta-2-microglobulin	PanCk	CD11c	HLA-DR	SMA	Fibronectin	CD56	GZMB	CD4	Ki-67	CD3	CD8	STING	VISTA	Tim-3	ARG1	B7-H3	IDO1	CD25	ICOS	CD44	CD127	CD40	CD34	FAP-alpha	CD45RO	CD14	CD163	EGFR	INPP4B	p44/42 MAPK ERK1/2
CVAIR-NCL-004-1A	EDAD-P001	Newcastle	EDAD	1	F	C	A	F	E	C	0	0	0	4	9.98097	11.7757	0	12.8579	8.15643	12.0235	8.45486	9.91205	12.2488	9.95129	3.31067	9.00965	7.31184	8.68201	3.1434	8.76722	8.01376	9.14864	0	8.37105	9.01449	9.44495	0	0	12.8513	7.63866	4.62399	10.6755	0	0	10.7668	0	7.9333	3.31183	8.19214
CVAIR-NCL-004-1A	EDAD-P002	Newcastle	EDAD	1	F	C	A	F	E	C	0	0	0	4	9.6542	11.1781	0	12.8011	8.51992	11.3022	7.28904	10.5322	12.1006	9.58923	6.17159	8.34368	8.17112	7.88279	0	9.16119	6.2667	8.21635	0	9.69376	9.88793	10.8946	0	3.55515	12.7764	8.13409	0	11.557	7.14799	0	10.9763	0	8.23165	6.09236	8.47877
CVAIR-NCL-004-1A	EDAD-P003	Newcastle	EDAD	1	F	C	A	F	E	C	0	0	0	4	9.58048	10.5836	0	13.1904	7.84822	12.4201	7.79256	9.74937	12.0562	9.07799	5.7452	6.18768	8.05928	9.45364	0	9.0445	0	6.23275	0	9.78356	9.79289	10.0544	0	0	12.5001	7.36125	0	10.371	5.95649	0	9.81024	7.77981	8.42878	5.04608	7.90285
CVAIR-NCL-004-1A	EDAD-P004	Newcastle	EDAD	1	F	C	A	F	E	C	0	0	0	4	11.0372	11.3149	0	12.7617	7.57461	8.22879	8.74187	9.67123	12.1037	10.4426	5.84029	7.34129	7.74278	9.98151	0	8.45118	0	0	0	7.84152	8.55581	9.79858	0	0	12.6391	0	0	9.34669	0	0	9.83555	8.97871	5.58705	0	5.38514
CVAIR-NCL-004-1A	EDAD-V001	Newcastle	EDAD	1	F	C	A	F	E	C	0	0	0	4	9.86682	11.2998	0	13.7979	9.38014	11.5478	7.94349	10.0246	14.986	11.8767	6.90629	8.51455	9.12855	9.42309	5.4995	9.31525	6.72123	8.22926	7.96428	9.02513	11.4622	9.78924	0	0	15.0926	8.32344	0	12.0369	0	0	10.8938	5.42227	8.59813	0	9.46591
CVAIR-NCL-004-1A	EDAD-V002	Newcastle	EDAD	1	F	C	A	F	E	C	0	0	0	4	9.83552	11.8501	0	13.4637	8.63319	10.6255	8.62016	10.5705	14.1166	11.4252	6.65885	9.17359	9.02603	10.1772	4.69341	8.99797	5.64654	8.66027	6.89578	9.01662	10.7223	10.5877	3.41674	0	14.4203	8.23101	2.86449	11.6662	6.798	0	10.8877	7.7359	7.18916	4.64921	8.98716
CVAIR-NCL-004-1A	EDAD-V003	Newcastle	EDAD	1	F	C	A	F	E	C	0	0	0	4	9.61469	11.3501	0	12.9736	8.10649	10.5429	8.06571	9.22686	14.2006	10.1904	5.74343	8.44831	8.1346	8.99337	4.70793	9.54583	0	6.91586	0	10.8537	9.49661	10.8655	0	4.28371	12.4257	6.92668	0	10.3421	7.2178	0	10.5957	5.55929	8.87871	5.94519	8.59415
CVAIR-NCL-004-1A	EDAD-V004	Newcastle	EDAD	1	F	C	A	F	E	C	0	0	0	4	10.069	11.6885	0	13.6873	8.71657	12.4899	8.67058	11.0727	13.6935	9.88784	6.66869	8.13688	8.80301	10.0147	6.89722	9.14722	7.42163	6.08481	0	9.08057	10.3405	10.0458	0	0	13.3719	8.12229	0	11.0427	3.74055	0	9.27088	8.152	8.51161	0	8.40578
CVAIR-NCL-006-1B	EDAD-P006	Newcastle	EDAD	2	F	C	C	M	U	C	0	0	0	2	10.8495	11.1353	2.38541	13.4727	7.58726	13.1785	9.71144	10.6152	14.4897	12.8335	7.48128	8.89996	8.95856	8.62857	0	9.03781	8.96031	5.73587	7.85855	0	10.2052	9.36345	8.39323	6.66774	14.5286	9.84656	5.1582	12.2377	7.15473	6.97118	11.2104	8.77681	8.54808	8.73831	9.8955
CVAIR-NCL-006-1B	EDAD-P008	Newcastle	EDAD	2	F	C	C	M	U	C	0	0	0	2	11.0267	11.6241	0	13.7608	7.18916	13.4878	9.86542	10.8217	14.0668	13.0575	6.61168	9.12342	9.09644	9.02487	2.06366	9.1566	8.93214	6.63523	7.86125	0	9.97032	8.94728	9.1439	7.59226	14.2585	10.1669	4.34787	12.6699	8.25705	6.29699	11.482	9.08005	8.75092	8.48317	10.0643
CVAIR-NCL-006-1B	EDAD-P009	Newcastle	EDAD	2	F	C	C	M	U	C	0	0	0	2	11.201	11.4493	0	13.6122	6.52711	13.2686	9.60278	10.5456	14.1429	13.1047	4.34991	9.55322	7.32809	9.36734	0	8.72131	8.53306	0	7.29017	0	10.1292	9.47848	7.37935	7.21583	14.3787	9.76374	0	13.0314	7.32318	0	11.3516	8.24285	8.15517	7.77894	9.99699
CVAIR-NCL-006-1B	EDAD-V005	Newcastle	EDAD	2	F	C	C	M	U	C	0	0	0	2	11.4948	11.4916	0	13.5886	7.75241	12.8666	10.4222	10.6739	14.3098	12.6449	7.45431	9.66315	8.82468	8.86398	1.76064	9.21857	9.35625	7.66892	8.14628	0	10.071	9.50677	8.82725	7.84286	14.3476	9.95746	2.32323	12.0345	7.90893	6.25147	11.592	9.68235	8.7505	8.60063	10.2359
CVAIR-NCL-006-1B	EDAD-V005002	Newcastle	EDAD	2	F	C	C	M	U	C	0	0	0	2	11.1591	11.4641	6.10765	14.0272	8.7104	12.3808	9.43405	11.2519	16.027	14.4103	8.29723	9.62893	9.86438	9.12886	0	9.56208	9.33547	8.48967	9.76804	0	10.9174	10.0806	9.20581	7.09138	15.5004	10.398	8.39577	13.0334	7.65387	7.54352	11.3451	9.28236	9.20066	9.05604	10.6787
CVAIR-NCL-006-1B	EDAD-V006	Newcastle	EDAD	2	F	C	C	M	U	C	0	0	0	2	10.8896	11.5659	3.16462	13.4688	7.64263	13.134	9.77224	10.8411	14.8801	13.6012	7.2558	9.58556	9.07447	8.48708	5.0213	8.79356	9.2293	7.78908	8.72628	0	10.8784	9.60972	8.45065	7.43133	14.8147	9.97317	6.32727	13.1176	7.58185	6.94042	11.5145	8.79498	8.44061	8.50582	10.0659
CVAIR-NCL-006-1B	EDAD-V007	Newcastle	EDAD	2	F	C	C	M	U	C	0	0	0	2	11.4013	11.6608	0	13.1841	7.00152	11.2408	8.28692	11.1235	16.0384	13.9381	0	9.66422	8.93775	8.79879	0	9.46154	8.25409	7.55889	7.33255	0	9.80384	9.55276	8.22374	7.22582	14.7137	10.0499	0	13.0171	7.07226	0	11.9154	7.64986	7.0743	9.00496	10.8034
CVAIR-NCL-006-1B	MDAD-V003	Newcastle	MDAD	2	F	C	C	M	U	C	0	0	0	2	12.5543	12.2047	0	13.9584	8.45697	12.2617	10.9648	11.3825	15.6276	13.292	7.45601	9.66364	9.91319	8.92384	0	9.44708	9.51962	6.57909	8.91547	0	10.6291	9.27551	8.67031	7.56718	15.2765	10.1966	7.59976	11.7329	7.74502	7.75586	12.0532	11.2264	8.63263	8.37304	10.1713
CVAIR-NCL-006-1B	ODAD-P003	Newcastle	ODAD	2	F	C	C	M	U	C	0	0	0	2	10.7459	12.8232	0	12.9097	6.38234	10.8326	9.39798	10.6208	15.679	13.1984	8.39465	8.66889	10.8897	7.80511	9.4646	9.89757	7.35656	0	7.30048	0	9.07003	8.84996	7.43562	3.72215	14.6412	8.72736	2.14573	10.7442	0	8.54931	9.87595	9.32532	7.71831	7.56881	9.88383
CVAIR-NCL-15	006MDAD-P014	Newcastle	MDAD	3	S	C	C	F	E	H	1	1	0	1	10.4898	12.2295	0	13.2975	8.39812	9.83764	8.57347	9.77059	13.7612	11.4466	4.60041	7.49828	8.79114	10.0747	6.92451	11.0145	0	6.42958	0	10.9528	10.5509	9.87847	0	7.24705	13.6908	7.09321	0	9.04544	1.98818	0	9.52703	10.0146	0	0	8.71919
CVAIR-NCL-15	007EDAE-P059	Newcastle	EDAD	3	S	C	C	F	E	H	1	1	0	1	9.9393	12.1536	0	13.1499	8.2729	10.5345	8.40902	10.3888	15.5622	11.4477	6.84825	7.43519	8.58688	10.2227	7.16625	10.7601	0	6.69071	0	8.96194	9.98255	8.97135	0	4.98124	13.3145	6.53766	0	0	0	0	8.64953	9.11808	0	0	8.02384
CVAIR-NCL-15	008MDAD-V011	Newcastle	MDAD	3	S	C	C	F	E	H	1	1	0	1	9.79856	12.0228	0	13.2752	8.01721	10.6505	7.94863	9.05976	14.3552	10.7899	5.89371	7.6108	8.3637	10.4625	7.44208	10.7995	0	3.36071	0	10.0957	9.81133	9.6992	0	7.36678	12.8098	6.98146	0	7.16581	0	0	8.87344	8.82605	0	0	8.46106
CVAIR-NCL-15	009EDAD-P060	Newcastle	EDAD	3	S	C	C	F	E	H	1	1	0	1	10.8882	12.4254	0	13.7442	8.60122	11.8827	8.59971	10.1107	13.5762	11.7931	0	8.24743	8.83456	10.2319	7.44829	11.2005	0	6.98563	0	9.97158	10.5216	6.5454	0	8.5555	13.8057	8.25615	0	7.27622	4.64028	0	8.65142	10.1881	0	4.37401	8.58616
CVAIR-NCL-15	010EDED-P058	Newcastle	EDAD	3	S	C	C	F	E	H	1	1	0	1	10.4228	12.2524	0	13.7232	8.01327	12.04	8.56231	9.84838	13.6725	11.7088	0	7.15466	7.80199	10.4031	8.26755	11.2178	0	7.49934	0	9.65172	10.2348	6.79203	0	8.27015	13.6166	8.33258	0	7.34988	0	0	9.12149	9.14511	0	0	8.75947
CVAIR-NCL-16	001MDAD-V010	Newcastle	MDAD	4	S	C	D	M	L	H	U	1	U	3	9.73708	11.6995	0	13.0645	8.09509	10.3587	7.65327	10.0596	14.3198	11.73	5.48571	7.45822	8.2361	9.36977	0	9.60376	0	8.09676	0	11.6625	9.15318	10.044	0	0	13.8182	7.48577	0	9.50017	0	0	8.73977	9.28389	5.06987	0	7.56658
CVAIR-NCL-16	002EDAD-V031	Newcastle	EDAD	4	S	C	D	M	L	H	U	2	U	3	10.1973	11.4305	0	13.4386	8.7594	11.3668	7.79637	10.3341	14.4202	11.7598	7.94388	6.04583	7.2909	7.77864	0	9.70619	0.29912	8.04894	0	12.4097	9.91774	9.54898	5.54821	6.96867	14.0263	8.32465	0	8.22795	0	0	9.16203	8.47959	0	0	8.81954
CVAIR-NCL-16	010EDAD-P052	Newcastle	EDAD	4	S	C	D	M	L	H	U	3	U	3	9.3379	11.0219	0	12.9303	7.50222	10.8125	4.62773	9.85828	12.9831	11.167	0	4.0101	6.38507	8.13796	0	9.1754	0	0	0	11.1309	8.69408	10.7929	0	4.84706	13.356	6.47413	0	10.1885	0	0	8.96962	8.88211	0	0	8.04909
CVAIR-NCL-16	011EDAD-P051	Newcastle	EDAD	4	S	C	D	M	L	H	U	4	U	3	9.92697	11.3477	0	13.1768	8.79143	11.5297	7.15167	10.7929	14.4971	12.0757	7.60147	7.75046	8.10673	8.61001	0	9.29832	0	6.91194	0	10.0383	9.28687	10.5249	0	6.94121	13.8869	8.32273	0	10.976	0	0	9.05667	9.01843	6.27271	0	8.48852
CVAIR-NCL-16	012EDAD-P030	Newcastle	EDAD	4	S	C	D	M	L	H	U	5	U	3	11.0934	11.2198	0	12.8245	7.7129	11.4455	7.35641	9.86835	12.9311	11.4523	4.97573	6.0796	7.68154	8.88094	0	9.52024	0	6.74486	0	9.45605	8.25793	9.92476	0	0	13.3028	7.92244	0	8.76426	4.90767	0	9.76163	10.7403	4.25141	0	7.85988
CVAIR-NCL-16	014ODAD-P021	Newcastle	ODAD	4	S	C	D	M	L	H	U	6	U	3	10.55	12.5283	0	13.7598	8.47368	11.6246	7.75908	10.0648	14.3046	12.2806	4.16539	6.64149	9.71664	10.2437	8.99226	10.1083	0	4.3702	6.81416	6.6371	10.286	9.34791	4.60126	7.39729	13.9436	8.23821	6.4918	9.3322	0	0	8.67115	11.3436	0	0	8.45721
CVAIR-NCL-19	001ODAD-P038	Newcastle	ODAD	5	S	C	D	M	E	C	0	0	0	2	10.8224	12.0924	0	12.3815	6.11379	12.0035	8.66842	11.4293	15.9148	11.8861	3.09184	6.86246	8.68867	0	8.67294	10.4354	0	0	0	9.99106	10.3169	0	0	0	12.7909	0	0	8.74223	0	0	6.48805	0	0	0	8.30147
CVAIR-NCL-19	002ODAD-P037	Newcastle	ODAD	5	S	C	D	M	E	C	0	0	0	2	10.7406	12.5412	0	12.5048	6.61257	12.2851	9.07632	11.4604	14.9835	11.3586	6.8003	8.20023	9.08364	6.53918	9.04611	10.9954	0	0	0	9.70162	9.23137	0	0	0	13.112	6.04764	0	8.93109	0	0	5.38456	7.06898	0	0	8.366
CVAIR-NCL-19	008ODAD-P036	Newcastle	ODAD	5	S	C	D	M	E	C	0	0	0	2	11.2646	11.884	0	11.9772	5.49958	11.7677	7.92639	11.7726	14.3849	10.9893	6.60486	6.71264	8.61978	0	7.4423	9.85688	0	0	0	0	9.41986	0	0	0	13.0945	4.08714	0	8.81049	0	0	0	4.3256	0	0	7.73221
CVAIR-NCL-19	009ODAD-V023	Newcastle	ODAD	5	S	C	D	M	E	C	0	0	0	2	11.2301	11.4493	0	11.8386	5.58357	11.2975	8.38093	11.7983	15.3008	11.6663	6.68506	6.2336	8.4072	0	0	9.6688	0	0	0	0	9.9278	0	0	0	12.8692	0	0	9.76441	0	0	0	5.38352	0	0	7.82109
CVAIR-NCL-19	010MDAD-V012	Newcastle	MDAD	5	S	C	D	M	E	C	0	0	0	2	12.2983	12.9509	0	12.8739	7.79586	11.2465	10.1739	12.499	15.9466	12.9333	0	8.96491	10.3476	6.92283	6.98688	10.4577	5.39392	7.35016	8.13832	0	11.2795	8.28367	0	0	15.2528	7.39496	5.40966	11.2965	0	0	9.1438	8.07284	0	0	8.65447
CVAIR-NCL-19	011MDAD-P016	Newcastle	MDAD	5	S	C	D	M	E	C	0	0	0	2	11.8838	12.5359	0	12.8829	6.53561	12.1337	9.81201	12.3073	15.8869	12.5689	5.84693	8.42891	9.99957	8.00517	7.31329	10.4329	2.91672	7.17869	7.67316	0	11.0849	9.28149	0	5.66434	15.116	8.36451	5.88583	10.7308	0	0	8.88766	7.42611	4.97549	5.39579	9.50882
CVAIR-NCL-19	012ODAD-V021	Newcastle	ODAD	5	S	C	D	M	E	C	0	0	0	2	13.2385	12.6648	0	13.7575	8.56073	12.5918	10.0376	12.9303	16.2313	12.7924	7.3897	7.98101	10.6589	0	0	9.91476	0	0	7.62865	0	11.4606	0	3.75984	0	15.5831	8.15062	8.24685	10.2441	0	0	9.03974	11.2757	6.3555	0	9.7804
CVAIR-NCL-19	013ODAD-P033	Newcastle	ODAD	5	S	C	D	M	E	C	0	0	0	2	12.2818	13.0283	0	13.875	8.68228	13.3259	9.80646	12.8608	16.4371	13.3357	8.03807	9.39069	10.2967	8.69788	9.3921	10.781	8.84906	6.60305	9.15467	0	11.7394	6.27986	7.42753	0	15.3171	9.00451	7.55852	11.1054	4.57547	7.08983	8.49479	9.06702	7.61876	6.94371	9.93352
CVAIR-NCL-19	014MDAD-P015	Newcastle	MDAD	5	S	C	D	M	E	C	0	0	0	2	12.6576	13.3776	0	13.5514	8.19361	12.5305	10.3642	13.3865	16.1153	12.8226	0	9.2233	10.2198	6.048	8.49043	10.7644	6.62271	8.57467	9.15524	0	11.5656	9.44428	2.23805	0	15.5789	8.01925	7.95919	11.282	0	0	9.06134	8.25592	0	0	9.17806
CVAIR-NCL-19	020ODAD-P034	Newcastle	ODAD	5	S	C	D	M	E	C	0	0	0	2	12.488	13.3845	0	14.3489	7.80255	13.9134	9.87221	13.0548	17.2097	13.9092	7.571	10.1946	10.9541	8.10949	9.93703	11.4899	8.96164	7.02161	10.3751	0	12.0766	0	7.65515	0	15.8072	9.49016	8.54333	11.557	0	5.16105	8.52538	10.0404	8.96346	6.8954	10.1913
CVAIR-NCL-20	001-EDAD-P080	Newcastle	EDAD	6	S	B	A	M	E	H	0	1	0	4	10.4284	11.1772	0	13.0918	7.47625	12.5257	8.52133	10.7665	13.8693	12.3818	7.65572	7.6042	6.69446	6.29068	0	9.1902	6.56495	8.69157	7.99895	10.3502	10.1079	0	4.14575	0	14.2723	9.25492	4.79292	9.5859	0	0	9.48894	8.93927	3.20771	5.96181	9.257
CVAIR-NCL-20	002EDAD-P081	Newcastle	EDAD	6	S	B	A	M	E	H	0	1	0	4	10.631	10.8998	0	12.1714	6.01684	11.772	8.11196	9.68739	13.5242	11.1757	6.96792	6.79336	6.66709	6.53346	0	8.52538	0	7.65844	0	10.7462	9.83428	0	0	0	14.0948	7.59518	0	6.81733	0	0	9.31407	9.36976	0	0	8.06036
CVAIR-NCL-20	003EDAD-P087	Newcastle	EDAD	6	S	B	A	M	E	H	0	1	0	4	10.6926	10.9021	0	12.1529	7.20544	12.0067	8.16881	9.70732	12.7177	11.206	6.2531	7.09039	6.54011	7.73913	0	9.05241	0	7.76217	0	10.8815	9.75505	0	2.912	0	13.6633	8.30427	0	9.25317	0	0	9.17738	9.23907	0	0	8.16701
CVAIR-NCL-20	004EDAD-P086	Newcastle	EDAD	6	S	B	A	M	E	H	0	1	0	4	10.696	10.8866	0	12.183	7.04699	11.5348	8.52878	9.92365	14.2811	11.707	7.71969	6.95406	7.90011	7.63925	5.83612	9.37054	4.55714	7.59405	6.08726	11.0365	10.0913	0	4.19487	3.73862	13.7106	8.46744	0	9.51273	0	0	8.9709	9.29734	0	4.07424	8.14054
CVAIR-NCL-20	011EDAD-P083	Newcastle	EDAD	6	S	B	A	M	E	H	0	1	0	4	10.9754	10.8678	0	12.111	6.77766	10.9103	7.81355	9.62307	13.4297	11.5454	6.77291	8.0069	7.43399	6.72683	0	8.87357	0	2.36855	5.10028	10.4903	9.93026	8.21272	0	3.098	13.533	7.17844	0	9.17613	0	0	8.83414	9.62879	0	0	8.31406
CVAIR-NCL-20	012EDAD-P079	Newcastle	EDAD	6	S	B	A	M	E	H	0	1	0	4	10.3329	11.0338	0	12.047	5.28837	11.3763	8.14088	9.48392	13.6715	11.7712	5.80029	5.94581	7.1206	6.23447	0	8.73624	0	7.15484	0	10.5083	9.33366	0	0	0	13.6743	8.15301	0	7.79158	0	0	9.37112	7.22377	0	0	8.34349
CVAIR-NCL-21	001EDAD-P064	Newcastle	EDAD	7	S	C	A	M	E	C	0	0	0	3	10.5058	11.2762	0	13.2518	7.86215	11.2682	8.11242	10.2653	16.2888	13.0076	7.41127	7.42999	8.78979	9.01476	0	9.47978	7.4042	8.96553	6.83232	11.8197	11.1564	10.6385	3.40697	6.17955	14.6933	8.64637	0	11.126	0	0	9.61385	6.26472	0	0	9.49976
CVAIR-NCL-21	002EDAD-P063	Newcastle	EDAD	7	S	C	A	M	E	C	0	0	0	3	10.5884	11.5428	0	12.8784	6.27972	11.0158	8.13993	10.2882	14.5642	12.4699	3.28041	8.01311	8.27358	9.92874	0	9.74721	8.06468	9.20268	5.94464	12.0786	10.7404	10.7424	5.78132	6.00881	14.361	8.52788	0	11.0152	3.44721	0	10.2274	7.20595	0	0	9.51634
CVAIR-NCL-21	003EDAD-V038	Newcastle	EDAD	7	S	C	A	M	E	C	0	0	0	3	10.7018	11.7726	0	12.9895	7.38762	10.846	8.49725	11.0485	14.9232	12.7989	6.8358	7.39767	8.49256	9.41979	5.51394	9.88859	7.68743	9.50688	6.56167	12.2254	11.0988	9.47999	6.82496	7.90958	14.6911	8.85479	0	10.8774	5.31206	0	10.5242	6.96138	0	0	9.66656
CVAIR-NCL-21	004EDAD-P067	Newcastle	EDAD	7	S	C	A	M	E	C	0	0	0	3	10.7096	11.4976	0	12.8695	7.35894	10.8442	8.21108	10.9868	14.6823	12.453	0	6.58525	8.28406	9.5828	0	9.86021	8.03538	9.64944	1.70195	12.2578	10.9262	9.3342	7.09815	7.72147	14.445	8.72279	0	10.902	5.26198	0	10.3734	6.22085	0	0	9.55543
CVAIR-NCL-21	011EDAD-P065	Newcastle	EDAD	7	S	C	A	M	E	C	0	0	0	3	10.6184	11.8399	0	13.2357	6.9729	10.7624	6.84925	10.9505	15.0572	12.9142	0	7.09141	8.44515	9.37095	0	9.45153	8.50198	9.8049	6.70316	11.725	11.2994	8.37835	0	0	15.4232	8.84665	0	11.304	3.77539	0	10.1807	5.64002	0	0	8.7962
CVAIR-NCL-21	012EDAD-P066	Newcastle	EDAD	7	S	C	A	M	E	C	0	0	0	3	10.6067	11.4197	0	12.6944	6.06988	9.46529	6.99121	10.6563	14.8371	12.5934	0	4.05564	7.2113	8.75472	0	9.5307	6.19408	9.17878	0	12.2047	10.9009	10.0279	0	3.11558	14.5488	8.18575	0	10.6715	0	0	10.0787	7.5686	0	0	8.62175
CVAIR-NCL-21	013EDAD-P068	Newcastle	EDAD	7	S	C	A	M	E	C	0	0	0	3	10.9767	12.072	0	13.4378	8.52264	11.236	8.7584	11.4204	15.179	13.2475	6.8356	7.77188	8.97507	9.644	3.65306	9.71934	9.07188	10.3342	8.2715	11.7884	11.6804	8.89481	7.34862	5.6811	15.6487	9.65787	4.43251	11.3078	4.29237	0	10.832	8.09562	0	0	9.44638
CVAIR-NCL-21	014EDAD-P062	Newcastle	EDAD	7	S	C	A	M	E	C	0	0	0	3	10.9385	11.7148	0	13.6467	7.88982	11.5456	8.06736	10.3924	14.3555	13.41	7.30842	6.32064	9.17862	9.34674	6.57126	9.86892	7.66236	7.66206	8.46632	10.8997	11.7349	8.43716	6.67929	5.89078	15.5837	9.05331	5.60368	11.2924	0	0	8.99652	9.05721	0	0	8.99928
CVAIR-NCL-21	015EDAD-V037	Newcastle	EDAD	7	S	C	A	M	E	C	0	0	0	3	10.5883	11.1381	0	13.0454	7.59625	10.8831	7.71564	10.6277	14.3303	12.8979	6.17689	0	8.4099	7.03424	0	8.96137	0	7.30564	6.65377	10.918	11.3927	8.86488	4.81274	0	14.8328	7.30351	0	10.9201	0	0	9.52092	9.07702	0	0	8.13573
CVAIR-NCL-21	016EDAD-P061	Newcastle	EDAD	7	S	C	A	M	E	C	0	0	0	3	9.82478	10.2476	0	13.0852	6.52544	12.7348	7.47343	9.79789	13.2964	11.5074	6.14099	6.18659	7.72731	8.48619	0	8.56312	7.02368	3.06083	5.82269	10.4929	10.7767	5.4098	3.2447	0	13.7261	7.84949	0	8.94617	0	0	8.3719	8.25804	7.86932	0	7.78602
CVAIR-NCL-22	006EDAD-P054	Newcastle	EDAD	8	S	B	A	F	E	C	0	0	0	3	11.5787	11.5366	0	12.4997	5.61317	11.5488	7.75153	11.1309	13.7897	11.978	0	10.66	7.74902	8.12245	6.25927	10.2984	0	8.18083	0	0	8.58769	9.48598	0	6.77256	13.5803	0	0	9.83836	4.32519	0	10.331	0	0	0	0
CVAIR-NCL-22	007EDAD-P053	Newcastle	EDAD	8	S	B	A	F	E	C	0	0	0	3	11.2274	11.3139	0	12.3754	4.71252	11.5817	6.96069	11.0699	12.6704	11.8996	6.77109	10.0682	7.84715	8.4467	6.33047	9.90613	0	7.41274	0	0	8.29769	8.65532	0	5.21725	13.3719	0	0	8.47693	4.34925	0	9.58687	0	0	0	0
CVAIR-NCL-22	008EDAD-V032	Newcastle	EDAD	8	S	B	A	F	E	C	0	0	0	3	11.176	11.4533	0	12.1946	7.26739	10.927	7.34238	11.3983	13.5253	12.1282	4.25954	10.1998	7.60711	8.09692	0	10.083	0	7.79364	0	0	8.74895	9.22263	0	4.56043	13.6394	0	0	9.77765	0	0	9.30938	0	0	0	0
CVAIR-NCL-22	009EDAD-V033	Newcastle	EDAD	8	S	B	A	F	E	C	0	0	0	3	11.3722	11.2909	0	12.3018	6.93085	11.5799	6.68409	11.6813	13.7955	11.7126	0	9.73546	8.24336	8.47707	5.45043	9.82719	0	8.44602	0	0	8.64824	9.42081	0	0	13.4932	0	0	8.91615	0	0	9.41882	0	0	0	0
CVAIR-NCL-22	010EDAD-P055	Newcastle	EDAD	8	S	B	A	F	E	C	0	0	0	3	11.2458	11.3877	4.83174	12.2455	7.89648	11.6584	7.90506	11.3729	12.8968	11.6172	7.85796	9.9096	8.37521	7.79091	6.85564	9.53201	0	8.83632	0	0	9.06988	9.64095	0	5.37267	13.6341	4.35057	0	9.09184	0	0	9.13717	0	3.98625	0	5.47926
CVAIR-NCL-22	011EDAD-V034	Newcastle	EDAD	8	S	B	A	F	E	C	0	0	0	3	11.552	11.3135	0	12.2428	7.54655	11.7015	7.66542	11.7871	13.2376	11.6064	7.22672	10.017	8.41304	8.30798	6.01902	9.95828	0	8.46741	0	0	9.32168	9.60568	0	6.12223	13.5046	6.00203	0	9.15477	5.21167	0	10.0689	0	0	0	5.64489
CVAIR-NCL-22	012EDAD-P057	Newcastle	EDAD	8	S	B	A	F	E	C	0	0	0	3	11.5758	11.3935	0	12.2993	6.64252	11.5102	7.68626	11.7362	13.0523	11.7774	7.2859	9.94884	6.35855	7.94348	0	9.91501	0	8.42842	0	0	8.23261	10.1997	0	5.06432	13.6091	0	0	8.88687	0	0	10.2335	0	0	0	0
CVAIR-NCL-22	018EDAD-V035	Newcastle	EDAD	8	S	B	A	F	E	C	0	0	0	3	11.8971	11.651	0	12.4439	7.87781	11.7947	8.0648	11.9589	14.1578	11.8299	5.48681	10.257	7.5389	8.7929	7.85168	10.4021	0	8.52117	0	0	8.24643	8.9772	0	3.74266	13.4891	0	0	9.22523	0	0	9.5319	0	0	0	6.66919
CVAIR-NCL-22	019EDAD-P056	Newcastle	EDAD	8	S	B	A	F	E	C	0	0	0	3	11.5488	11.1899	0	12.7173	0	12.493	7.2906	11.6762	15.9357	12.7672	6.41902	10.2045	7.69953	6.88202	0	10.4105	0	4.91936	0	0	8.10121	9.77872	0	0	13.7437	0	0	10.3004	0	0	9.4646	0	0	0	5.90752
CVAIR-NCL-22	020EDAD-V036	Newcastle	EDAD	8	S	B	A	F	E	C	0	0	0	3	11.5677	11.0956	0	12.4166	0	12.1214	6.31972	11.3518	15.1445	11.8786	0	9.71712	7.3404	5.34463	0	10.5794	0	0	0	0	7.76561	9.01939	0	4.53002	13.2617	0	0	8.37886	0	0	9.12148	0	0	0	4.80963
CVAIR-NCL-23	001EDAD-P077	Newcastle	EDAD	9	S	C	B	M	U	H	0	1	0	4	11.0582	11.9199	0	12.9774	7.81958	10.5962	8.66438	11.2039	12.2275	11.6851	6.97879	5.03161	7.79647	8.6907	0	8.41167	7.7905	8.22772	0	11.5278	0	8.60808	0	0	13.7321	6.20052	0	9.24801	0	0	9.72865	10.8886	0	0	6.33476
CVAIR-NCL-23	002MDAD-P017	Newcastle	MDAD	9	S	C	B	M	U	H	0	1	0	4	11.3668	11.2164	0	12.2	6.92167	10.0231	7.63639	10.8433	12.5114	11.1433	6.89477	0	7.51047	0	0	8.75572	0	0	0	11.0196	0	0	0	0	13.3151	0	0	0	0	0	9.83301	10.9404	0	0	0
CVAIR-NCL-23	003EDAD-P075	Newcastle	EDAD	9	S	C	B	M	U	H	0	1	0	4	10.5931	11.4942	0	12.7659	7.84153	10.7476	8.21273	10.7907	12.5815	11.268	6.30742	0	7.65666	8.82416	0	8.94983	8.36144	7.01236	0	12.7189	0	8.96379	0	5.41697	13.1979	5.92276	0	6.39858	0	0	9.30369	10.3627	0	0	7.02374
CVAIR-NCL-23	004EDAD-P074	Newcastle	EDAD	9	S	C	B	M	U	H	0	1	0	4	10.8766	12.2923	0	13.2533	7.8604	11.283	8.8884	12.0389	12.7499	11.7776	6.77017	7.41623	7.74243	9.63552	4.83407	9.13358	9.18687	8.72079	4.75707	11.4198	0	10.0774	0	0	14.3086	7.07363	6.4881	9.17215	0	0	9.00921	10.5629	3.5185	0	6.35225
CVAIR-NCL-23	013EDAD-P071	Newcastle	EDAD	9	S	C	B	M	U	H	0	1	0	4	11.4139	12.5355	2.06891	13.4251	8.62998	11.9107	9.4205	11.5681	12.325	11.6532	7.55578	8.21617	8.46913	10.1163	7.22181	9.23946	8.84337	8.92801	7.95576	10.5348	0	10.0098	3.81039	0	14.7491	7.32315	7.38827	8.63832	0	1.36707	9.73002	11.4376	6.0633	0	7.53165
CVAIR-NCL-23	014EDAD-P073	Newcastle	EDAD	9	S	C	B	M	U	H	0	1	0	4	10.7506	12.2193	0	13.386	8.22579	11.0244	8.93862	11.1463	13.4805	12.3019	7.485	6.71932	8.07081	9.59186	6.04489	9.02263	8.97456	9.2556	6.49655	11.4299	0	9.94326	0	0	14.2352	7.35246	6.4189	8.69347	0	0	9.01861	10.5625	4.13752	0	7.93738
CVAIR-NCL-23	015EDAD-V043	Newcastle	EDAD	9	S	C	B	M	U	H	0	1	0	4	10.4179	12.2629	0	12.5595	7.46348	9.31896	8.31362	10.2778	12.5405	11.743	6.28194	6.92683	7.73781	10.007	5.67282	8.38731	9.71944	9.71204	4.55479	10.6817	0	9.0909	0	0	13.4903	6.33704	3.83843	7.90998	0	0	8.84114	10.3943	0	0	7.60275
CVAIR-NCL-23	016EDAD-P072	Newcastle	EDAD	9	S	C	B	M	U	H	0	1	0	4	11.1997	12.6597	0	13.8619	8.21827	11.5369	9.51951	11.7174	12.8132	12.4511	7.59685	7.10227	8.3553	9.64568	4.26257	9.16497	9.30847	9.62904	8.31445	10.5573	0	9.1402	5.75305	0	14.7732	7.95972	6.81763	9.9796	0	4.56309	10.0944	11.0055	5.71938	0	8.37485
CVAIR-NCL-24	006EDAD-P069	Newcastle	EDAD	10	S	C	C	M	L	H	U	U	U	1	9.70129	11.6138	0	12.1421	8.88793	10.1208	7.11482	10.4674	12.0488	10.7238	2.97623	7.0978	6.80231	10.0185	0	8.86093	8.94737	9.15144	0	10.3728	5.24422	7.68848	0	0	12.5156	4.99835	0	8.4167	0	0	8.4064	0	3.7692	0	8.64709
CVAIR-NCL-24	007EDAD-P070	Newcastle	EDAD	10	S	C	C	M	L	H	U	U	U	1	9.32395	11.3558	0	11.9758	7.68866	10.3012	2.0464	9.84882	11.1791	10.3016	0	0	4.66194	10.085	0	7.84944	8.49117	8.82199	0	10.4705	0	7.29664	0	0	12.0895	0	0	7.18197	0	0	8.29425	0	0	0	8.5042
CVAIR-NCL-24	008EDAD-V041	Newcastle	EDAD	10	S	C	C	M	L	H	U	U	U	1	9.6913	11.5798	0	12.0494	8.01078	10.4923	6.79414	10.0314	10.9118	10.6732	0	7.35884	7.27586	10.0859	0	8.42876	8.74036	8.94107	0	10.1128	4.75301	8.80029	0	0	12.4913	3.23125	0	7.8166	0	0	8.22495	0	5.18627	0	8.37926
CVAIR-NCL-24	009EDAD-V040	Newcastle	EDAD	10	S	C	C	M	L	H	U	U	U	1	9.85397	11.2144	0	12.1425	8.16643	10.9557	7.18804	10.4276	12.6194	11.2071	0	7.26784	5.63196	10.0672	0	7.92273	8.58563	8.64129	0	9.8122	7.60687	7.71278	0	0	12.4892	3.33796	0	7.98654	0	0	8.20421	0	0	0	7.93833
CVAIR-NCL-24	010EDAD-V040	Newcastle	EDAD	10	S	C	C	M	L	H	U	U	U	1	9.97903	11.21	0	11.9557	8.66734	10.9087	6.44031	9.96543	11.3154	10.2081	0	6.11821	6.03245	9.77354	0	8.50434	8.01983	7.73231	0	10.2131	3.83188	7.41309	0	0	12.123	0	0	6.70417	0	0	7.4591	0	0	0	8.05016
HL 080 IC01	2.1ODAD-V011	Edinburgh	ODAD	11	F	C	B	M	L	H	1	1	1	1	10.495	11.4823	0	12.9463	8.36961	10.5586	9.40958	11.1612	14.6097	11.1067	6.11399	1.16571	9.19435	7.80795	8.8471	11.0844	7.39477	6.4303	7.39458	0	10.7816	2.19277	0	0	10.8562	5.3193	0	10.3204	0	0	9.31754	10.6367	5.27285	0	8.09216
HL 080 IC01	2.4ODAD-P010.2	Edinburgh	ODAD	11	F	C	B	M	L	H	1	1	1	1	10.6943	10.9848	0	13.0966	7.8339	11.6046	8.75981	10.4773	13.9176	10.0654	5.06011	3.05438	8.40817	7.08397	7.67505	10.2761	5.07078	5.54588	6.35	0	10.4286	0	0	0	10.6995	6.01111	0	10.7597	0	0	8.89745	10.3519	6.63452	0	7.93328
HL 080 IC01	2.6ODAD-P008	Edinburgh	ODAD	11	F	C	B	M	L	H	1	1	1	1	9.30762	10.8693	0	12.331	7.39361	10.4373	7.77635	10.3646	13.8323	10.6717	6.45531	4.545	8.60746	6.00448	8.81853	11.3672	0	4.1969	6.24178	0	10.1848	0	0	0	10.6652	0	0	9.62304	0	0	8.10602	9.56241	6.13586	0	6.65846
HL 080 IC01	2.7ODAD-V008	Edinburgh	ODAD	11	F	C	B	M	L	H	1	1	1	1	9.83042	11.2253	0	12.5197	7.43598	10.0249	9.02152	10.1575	14.0762	11.134	3.51518	1.33468	8.7292	5.35181	9.18006	11.2835	6.45265	6.17254	7.16577	0	10.5464	6.33393	0	0	10.7492	0	0	8.93781	0	0	8.91443	10.0278	5.84914	0	7.55577
HL 080 IC01	2.8ODAD-P009	Edinburgh	ODAD	11	F	C	B	M	L	H	1	1	1	1	9.70064	10.3441	0	12.1258	7.12806	11.5721	8.35234	10.6291	13.3926	10.3643	5.65337	1.71719	7.96397	6.12166	7.7387	9.82973	0	0	6.37033	0	9.90752	0	0	0	10.8415	0	0	9.92497	0	0	7.97225	8.9629	6.73975	0	7.33165
HL 080 IC01	2.9MDAD-P005	Edinburgh	MDAD	11	F	C	B	M	L	H	1	1	1	1	11.196	11.9917	0	12.5051	8.60328	10.8149	8.95244	9.80231	14.0591	11.0979	0	7.96424	9.85533	8.32524	6.12763	10.651	7.44797	7.82581	9.07503	0	11.0468	5.60597	0	4.76729	12.8506	7.64542	7.23675	10.8472	0	6.18568	9.26833	7.98882	0	0	8.19223
HL 080 IC02	.6MDAD-P006	Edinburgh	MDAD	12	F	C	B	M	L	H	0	1	1	1	11.8203	11.1326	0	13.1966	7.26121	12.6139	11.313	10.5769	14.3318	10.6615	5.9648	5.72579	8.84581	7.86179	4.65087	8.37018	8.88083	0	3.69754	0	10.4044	0	2.01667	0	10.8947	7.13862	0	7.33064	0	0	9.35739	10.6035	9.00646	7.672	9.0161
HL 080 IC02	1.3ODAD-P014	Edinburgh	ODAD	12	F	C	B	M	L	H	0	1	1	1	10.3103	10.8284	0	12.9	6.33558	11.3173	8.4736	10.1835	14.9884	11.2696	6.62219	4.26995	8.22082	9.53836	5.61607	9.28007	8.0754	5.83923	0	0	10.0362	0	0	0	10.1761	5.24729	0	5.2415	0	0	7.99781	8.69742	8.91472	5.42787	8.61398
HL 080 IC02	1.4ODAD-P0111	Edinburgh	ODAD	12	F	C	B	M	L	H	0	1	1	1	10.9321	11.212	0	13.2115	6.8981	12.192	10.1748	10.1967	15.2769	10.9037	6.68838	4.68917	8.60061	8.4241	7.01942	8.98591	7.82512	0	0	0	10.2698	0	0	0	10.6226	4.73059	0	8.10534	0	0	9.45288	10.111	8.79045	6.58077	8.83485
HL 080 IC02	1.7ODAD-P012	Edinburgh	ODAD	12	F	C	B	M	L	H	0	1	1	1	11.4722	11.3337	0	13.3315	7.1188	11.8024	10.5602	10.783	15.5967	11.5286	5.13365	4.5821	8.97658	8.75405	6.68746	9.14755	10.4822	0	0	0	10.8128	0	0	0	11.0931	5.20471	0	7.42267	0	0	8.72238	9.9159	9.2053	6.56675	9.09539
HL 080 IC02	2.1ODAD-P013	Edinburgh	ODAD	12	F	C	B	M	L	H	0	1	1	1	10.0656	11.323	0	13.0798	7.61764	10.1281	8.00066	10.5563	14.819	11.2061	4.14735	4.092	9.42089	8.34522	8.37025	9.49311	8.63674	0	5.33318	0	10.1105	0	0	0	11.493	5.72803	0	7.99117	0	0	9.49411	9.63462	8.10281	2.70436	9.06031
HL 080 IC02	2.5MDAD-P007	Edinburgh	MDAD	12	F	C	B	M	L	H	0	1	1	1	10.5653	10.7698	0	13.2314	7.23849	11.2548	9.62617	10.0286	15.4713	11.7094	5.36075	4.37131	8.67489	8.28836	0	8.37607	8.07708	0	5.94837	0	10.7967	0	0	0	10.6523	5.7572	0	8.37126	0	0	9.21804	9.79375	9.23285	6.96646	9.12316
HL 080 IC03	1.1MDAD-P009	Edinburgh	MDAD	13	F	C	C	M	L	H	1	1	1	1	10.1571	11.3412	0	12.9682	7.7122	11.8077	7.24042	9.89436	12.8566	10.8208	5.82606	7.92003	8.71449	10.5924	0	9.44736	0	0	0	0	9.82915	10.0294	0	0	11.8126	0	0	9.89887	0	0	7.71934	8.62657	5.47152	0	6.88235
HL 080 IC03	1.2MDAD-P030	Edinburgh	MDAD	13	F	C	C	M	L	H	1	1	1	1	10.0828	11.1786	0	13.3037	7.96993	12.6662	6.99949	10.0427	12.8779	10.6853	3.46769	8.35067	8.25576	10.356	5.74968	9.64995	0	0	0	0	9.95926	10.736	0	0	11.5214	0	0	9.6087	0	0	7.92137	8.78698	7.41636	0	6.92325
HL 080 IC03	1.3EDAD-P029	Edinburgh	EDAD	13	F	C	C	M	L	H	1	1	1	1	9.79954	11.1198	0	13.2134	8.64545	12.1922	7.48546	10.6233	12.3271	10.7326	7.50379	8.77811	8.32252	10.7893	6.28629	9.70792	6.04134	4.21124	0	0	9.19554	10.6046	0	0	11.2935	3.73038	0	9.52616	0	0	7.88966	7.60079	7.18109	0	8.25633
HL 080 IC03	1.4EDAD-P031	Edinburgh	EDAD	13	F	C	C	M	L	H	1	1	1	1	10.1836	11.8486	0	13.5518	9.01618	11.7935	7.66953	10.8577	13.2337	11.5764	5.78431	10.017	9.45134	10.1718	8.68792	10.5072	6.29812	4.88372	6.01058	0	10.7872	11.966	0	0	13.0032	7.09199	4.0467	10.3278	0	2.86133	8.75141	9.41839	6.92792	0	7.43579
HL 080 IC03	1.5EDAD-V021	Edinburgh	EDAD	13	F	C	C	M	L	H	1	1	1	1	10.8596	11.4389	0	13.3374	8.37474	12.239	7.81835	10.3988	13.8209	11.0214	5.34916	7.66134	8.35003	10.7451	4.57911	9.42831	2.79486	0	0	0	9.31374	10.132	0	0	11.0775	0	0	8.81392	0	0	8.21696	9.79021	7.49093	0	7.67419
HL 080 IC03	3.1EDAD-P033	Edinburgh	EDAD	13	F	C	C	M	L	H	1	1	1	1	10.5158	11.5639	0	13.1092	7.96803	12.3099	7.75394	9.93654	12.6066	10.2982	7.24154	8.88502	8.50093	10.449	5.85924	9.9459	5.33069	1.12657	0	0	9.46817	10.8394	0	0	11.2407	4.78284	0	9.93546	0	0	8.68332	8.95623	7.52958	0	8.32514
HL 080 IC03	3.2EDAD-P032	Edinburgh	EDAD	13	F	C	C	M	L	H	1	1	1	1	10.0888	11.3924	0	13.2964	8.40321	12.7545	7.05512	11.0364	12.9117	10.8962	7.05262	8.92876	8.23296	10.3736	0	9.73266	5.38338	0	0	0	9.89087	10.3228	0	0	11.3879	4.46242	0	9.47501	0	0	8.40765	7.88431	7.87988	0	8.27466
HL 080 IC03	3.3EDAD-V020	Edinburgh	EDAD	13	F	C	C	M	L	H	1	1	1	1	10.0797	11.309	0	13.0451	7.92334	11.7453	7.64151	10.7131	15.3352	12.0651	6.49892	8.54669	8.51534	9.99077	0	10.4623	0	0	0	0	10.03	10.7679	0	0	11.207	0	0	9.03916	0	0	8.80397	7.73403	7.80829	0	8.51726
HL 080 IC04	1.1ODAD-P018	Edinburgh	ODAD	14	F	C	B	M	L	H	0	1	1	1	10.651	10.9009	0	12.3044	3.79577	12.4727	10.2964	9.23044	14.9341	10.6741	6.12452	4.80712	8.16962	0.958682	2.91458	8.37575	9.0675	0	1.47426	0	10.5849	0	0	0	10.779	6.12083	0	8.0927	0	0	7.84817	8.51221	6.76946	0	8.83283
HL 080 IC04	1.2ODAD-V015	Edinburgh	ODAD	14	F	C	B	M	L	H	0	1	1	1	10.5532	10.8372	0	12.0611	2.04444	12.0839	10.0168	9.27724	14.7063	10.2601	6.33938	5.56511	8.05739	3.69489	0	8.7145	8.83711	0	0	0	10.3842	0	0	0	10.4372	4.84408	0	8.27965	0	0	7.14588	8.32258	2.00372	0	8.20078
HL 080 IC04	3.1ODAD-P017O5	Edinburgh	ODAD	14	F	C	B	M	L	H	0	1	1	1	11.1287	11.4676	0	12.0441	5.41744	11.4885	10.4704	10.351	15.2723	11.7513	6.328	3.99831	8.56207	5.85452	5.90766	8.33692	11.8361	0	6.49098	0	10.6433	0	0	0	11.2906	6.30948	0	7.02494	0	0	8.8307	9.16838	7.61681	0	8.09497
HL 080 IC04	3.2MDAD-P010	Edinburgh	MDAD	14	F	C	B	M	L	H	0	1	1	1	10.8239	10.7167	0	11.9631	0	12.4793	9.93494	9.63333	14.3134	10.7743	5.43453	0.0737037	8.26112	4.33285	3.20598	8.39075	8.49016	0	5.31422	0	10.3912	0	0	0	10.8545	5.16452	0	7.95197	0	0	7.83344	8.63606	6.44143	0	7.86798
HL 080 IC04	3.3ODAD-V016	Edinburgh	ODAD	14	F	C	B	M	L	H	0	1	1	1	9.81353	9.84852	0	10.9049	0	10.1435	6.28359	8.71967	13.4916	12.2613	0	0	6.90801	7.40108	0	7.38417	0	0	0	0	6.70082	0	0	0	9.17936	0	0	0	0	0	0	0	0	0	0
HL 080 IC04	3.4ODAD-P016	Edinburgh	ODAD	14	F	C	B	M	L	H	0	1	1	1	10.778	11.1658	0	12.3851	4.244	12.0437	10.1639	10.3703	14.6115	10.7158	6.10011	5.53898	8.73987	5.34398	5.99019	9.18005	9.19617	0	4.89938	0	10.5953	0	0	0	10.6128	4.56565	0	8.67841	0	0	8.32789	8.67662	5.01052	0	8.07074
HL 080 IC04	3.5ODAD-V014	Edinburgh	ODAD	14	F	C	B	M	L	H	0	1	1	1	10.3436	10.8828	0	12.2292	0	12.0106	9.39999	10.1771	14.95	10.8641	0	5.50068	8.47999	0	5.27561	9.26582	10.0789	0	0	0	10.5677	0	0	0	10.2361	0	0	9.27437	0	0	7.58493	8.35673	5.13818	0	7.60944
HL 080 IC04	3.6ODAD-V012	Edinburgh	ODAD	14	F	C	B	M	L	H	0	1	1	1	10.7485	11.3822	0	12.7148	4.13831	12.0918	9.27026	10.3915	14.2427	10.0754	3.42747	5.32076	8.92727	4.95707	7.80057	10.03	6.91255	0	0	0	10.325	0	0	0	10.5595	0	0	9.06349	0	0	7.89459	9.157	2.85354	0	7.89632
HL 080 IC04	3.7ODAD-P015	Edinburgh	ODAD	14	F	C	B	M	L	H	0	1	1	1	10.7781	10.7821	0	12.5487	5.36831	11.8916	9.65974	9.52421	13.4323	9.53502	5.51356	0	8.52717	0	5.49135	8.98445	2.45955	0	0	0	9.94977	0	0	0	10.0949	0	0	8.9743	0	0	7.78566	8.85029	0	0	7.26359
HL 080 IC04	3.8ODAD-V013	Edinburgh	ODAD	14	F	C	B	M	L	H	0	1	1	1	10.6827	10.412	0	12.439	0	11.9361	8.52661	9.16467	14.5088	10.021	0	0	8.06728	0	0	8.94934	0	0	0	0	9.93513	0	0	0	9.83258	0	0	6.24258	0	0	6.70732	8.57884	0	0	6.84281
HL 080 IC05	2.1OADA-V017	Edinburgh	ODAD	15	F	C	B	M	L	H	1	1	1	3	11.2994	11.2657	0	12.7611	0	11.5231	8.91775	10.3362	15.1684	11.0662	0	0	8.96027	0	0	9.22013	0	0	0	0	10.4133	0	0	0	11.2442	0	0	8.412	0	0	7.45351	9.33232	0	0	6.36334
HL 080 IC05	2.2ODAD-P024	Edinburgh	ODAD	15	F	C	B	M	L	H	1	1	1	3	11.2315	11.274	0	13.5029	5.81998	12.7115	9.62312	10.1342	14.8385	11.1297	4.46117	2.8236	9.11536	7.9035	4.63593	9.537	0	0	0	8.48909	10.6208	0	0	0	11.413	0	0	7.16646	0	0	9.06246	10.7645	0	6.53151	8.3046
HL 080 IC05	2.3DAD-P011	Edinburgh	ODAD	15	F	C	B	M	L	H	1	1	1	3	11.0117	10.9783	0	13.0927	6.52218	11.6588	9.26657	9.33495	14.6228	11.0488	0	0	9.42091	7.05551	0	8.92066	0	0	0	0	10.4718	0	0	0	11.5209	0	0	5.73065	0	0	8.75106	11.4602	0	0	7.54669
HL 080 IC05	2.4ODAD-P025	Edinburgh	ODAD	15	F	C	B	M	L	H	1	1	1	3	10.7131	10.941	0	13.0502	5.42066	12.1923	8.36786	9.32471	14.1481	11.0472	2.73363	0	8.55634	4.51624	0	8.90463	0	0	0	0	9.80382	0	0	0	11.1375	0	0	7.90833	0	0	8.41558	11.0065	0	0	7.31069
HL 080 IC05	2.5ODAD-P023	Edinburgh	ODAD	15	F	C	B	M	L	H	1	1	1	3	10.8619	11.1442	0	12.359	2.75267	11.3677	8.29457	10.1862	14.3513	11.1248	4.66148	0	8.92482	0	6.51319	9.41503	0	0	0	0	9.66986	0	0	0	10.8882	0	0	7.08907	0	0	5.32173	9.23297	0	0	6.591
HL 080 IC05	2.7MDAD-V007	Edinburgh	MDAD	15	F	C	B	M	L	H	1	1	1	3	10.9396	11.3614	0	12.6082	4.9936	10.7238	9.5785	9.99972	16.0805	11.6337	5.51169	0	9.16209	4.93596	6.62637	9.56955	0	0	0	0	10.3039	0	0	0	11.2867	0	0	6.08067	0	0	7.60725	9.12877	0	0	7.2438
HL 080 IC05	2.8ODAD-P021	Edinburgh	ODAD	15	F	C	B	M	L	H	1	1	1	3	10.7182	11.1378	0	12.7609	0	11.506	7.48469	9.8016	14.6734	11.376	0.551341	0	9.19515	0	5.58229	9.2743	0	0	0	0	10.0103	0	0	0	10.8316	0	0	8.2351	0	0	8.08447	9.52242	0	0	6.4233
HL 080 IC05	4.1ODAD-P022	Edinburgh	ODAD	15	F	C	B	M	L	H	1	1	1	3	10.7031	11.5124	0	12.8088	5.70333	10.9984	7.22249	9.77377	14.8251	11.4817	6.94898	4.18587	9.6012	0	6.75869	9.51994	0	0	0	3.64951	9.95841	0	0	0	11.5807	0	0	6.03203	0	0	7.85722	9.88657	0	0	7.49783
HL 080 IC05	4.2ODAD-P019	Edinburgh	ODAD	15	F	C	B	M	L	H	1	1	1	3	10.2851	11.3807	0	12.4891	0	10.7382	6.77508	9.46558	14.9294	11.468	0	4.51827	9.41161	0	7.16444	9.82823	0	0	0	0	9.97203	0	0	0	11.1885	0	0	2.4186	0	0	6.7275	8.23815	0	0	7.75442
HL 080 IC05	4.3ODAD-P020	Edinburgh	ODAD	15	F	C	B	M	L	H	1	1	1	3	10.6116	11.3958	0	12.7358	0	11.4074	7.17434	9.81783	14.8656	11.5835	5.47793	0	9.40121	0	5.40196	9.74812	0	0	0	0	9.70117	0	0	0	11.5408	0	0	7.61737	0	0	7.12047	8.96466	0	0	7.40314
HL 080 IC05	4.4ODAD-P026	Edinburgh	ODAD	15	F	C	B	M	L	H	1	1	1	3	10.3916	10.4655	0	12.9461	0	12.2359	8.18671	9.33211	16.3427	11.5656	0	0	8.7133	0	0	8.99706	0	0	0	0	10.2855	0	0	0	10.1263	0	0	0	0	0	0	6.37944	0	0	7.0492
HL 080 IC06	1.1MDAD-V008	Edinburgh	MDAD	16	F	C	C	M	E	H	0	1	0	3	9.87828	12.2452	4.8602	13.4849	9.17982	9.76936	7.42269	11.3448	14.3796	11.4144	6.599	9.97836	9.2342	8.51577	6.87079	10.0195	6.90069	0	0	0	8.97378	9.83767	0	0	12.6328	4.80406	0	9.01662	0	0	9.3468	7.25752	6.60286	0	7.76903
HL 080 IC06	1.2EDAD-V022	Edinburgh	EDAD	16	F	C	C	M	E	H	0	1	0	1	11.4927	12.085	8.1235	13.2702	9.51687	10.6445	8.35425	11.7524	13.3987	12.0717	5.40237	10.2882	9.58771	8.76184	8.63224	10.4986	8.48874	8.19756	6.12523	0	9.56292	9.85413	0	0	12.6426	7.35624	7.40948	9.7589	0	0	9.81013	10.7587	7.28261	0	8.71436
HL 080 IC06	1.4MDAD-P012	Edinburgh	MDAD	16	F	C	C	M	E	H	0	1	0	1	10.4871	12.9881	8.30527	13.3968	10.1455	9.63316	8.55096	11.3271	13.6745	11.1164	6.8313	10.8828	10.0672	10.1697	9.39018	11.157	9.36223	8.38747	5.60308	0	9.76018	10.8972	0	0	13.1392	7.45974	7.99191	10.306	0	4.29167	10.2723	9.62364	8.0757	0	8.21528
HL 080 IC06	3.1EDAD-P034	Edinburgh	EDAD	16	F	C	C	M	E	H	0	1	0	1	10.519	12.5255	8.61299	13.5175	9.84505	9.52822	9.99038	11.4207	13.33	10.9767	5.98309	10.153	9.75269	9.95989	8.8744	10.6187	9.19717	8.54599	6.06055	0	9.27255	11.0894	0	0	12.8958	7.23005	8.51707	10.0763	0	0	10.1449	9.5599	8.13052	0	7.92999
HL 080 IC06	3.2EDAD-V023	Edinburgh	EDAD	16	F	C	C	M	E	H	0	1	0	1	11.1182	12.0373	7.76336	14.1029	9.63065	11.17	8.90437	11.0255	13.5982	11.441	7.18035	9.52307	9.22929	9.21174	7.62862	10.0195	9.64741	9.16946	7.99412	0	9.81586	11.4567	0	0	13.1406	8.66926	7.64079	11.4214	0	0	10.8375	10.0734	8.53995	6.17651	8.89694
HL 080 IC06	3.3EDAD-P038	Edinburgh	EDAD	16	F	C	C	M	E	H	0	1	0	1	10.552	12.9053	7.02351	13.5935	9.39458	10.7081	8.29596	11.5188	13.1428	10.8889	5.06523	10.1601	9.26069	9.72714	9.48148	10.8636	8.78971	7.6902	0	0	8.39616	10.4317	0	0	12.4363	6.23754	6.6988	7.71513	0	0	9.42895	8.41531	7.65784	0	8.28143
HL 080 IC06	3.4EDAD-P036	Edinburgh	EDAD	16	F	C	C	M	E	H	0	1	0	1	11.2131	12.0034	8.2512	13.7577	9.66177	11.578	8.98621	10.7572	13.0073	10.9566	6.45646	9.61761	9.3689	9.30042	8.36728	9.95378	9.87194	9.02804	7.35138	0	9.55765	11.3155	0	0	12.7597	7.84328	7.86949	11.7322	0	0	11.1416	11.0911	8.82067	4.2446	8.69557
HL 080 IC06	3.5EDAD-P037	Edinburgh	EDAD	16	F	C	C	M	E	H	0	1	0	1	10.8075	12.524	8.56959	14.1725	10.0742	11.7701	8.84374	10.6964	13.6367	11.9183	6.74306	10.262	9.99823	10.773	9.47237	10.8035	9.94966	9.02847	7.80114	0	10.2308	11.47	0	5.14523	13.4557	8.5791	8.70065	10.7068	0	0	10.9692	10.1576	8.49429	5.6856	9.06032
HL 080 IC06	3.6EDAD-V024	Edinburgh	EDAD	16	F	C	C	M	E	H	0	1	0	1	11.1422	12.1559	7.52334	14.2057	10.1796	10.4292	8.77061	10.9532	15.0487	12.1446	7.01952	10.2287	10.0845	10.092	8.74194	10.7672	10.2381	8.87737	7.25243	0	10.3081	10.7701	0	0	13.5841	8.7058	8.08784	11.7254	0	2.79557	10.9074	10.713	8.67193	0	8.2868
HL 080 IC09	3.2EDAD-V027	Edinburgh	EDAD	17	F	C	B	M	E	H	0	1	1	2	11.053	11.6365	0	12.5475	8.69273	12.3806	8.35175	10.6575	13.2544	12.5489	7.88417	9.49274	10.1489	0	5.59163	9.48182	0	7.28905	5.53344	0	0	8.81082	0	0	13.0355	0	5.76686	10.0099	0	0	9.48952	7.58956	7.28227	0	0
HL 080 IC09	3.3EDAD-V026	Edinburgh	EDAD	17	F	C	B	M	E	H	0	1	1	2	10.0211	11.5094	0	12.6138	5.17142	12.2962	4.86022	10.2854	14.4602	12.3	0	9.55987	9.03563	0	2.89648	8.55139	0	0	0	0	0	8.28785	0	0	12.795	0	0	9.59456	0	0	5.88856	0	2.43182	0	0
HL 080 IC09	3.4EDAD-V025	Edinburgh	EDAD	17	F	C	B	M	E	H	0	1	1	2	11.1154	11.62	6.51114	12.9579	8.76237	13.2151	8.19447	10.9692	14.2338	12.6785	8.8208	9.9674	10.2906	0	6.17761	9.30565	0	5.35291	7.47537	0	0	9.30494	0	0	13.0082	7.27259	0	10.8103	0	0	9.48481	6.52079	8.18678	0	4.3297
HL 080 IC11	1.1EDAD-P040	Edinburgh	EDAD	18	F	C	D	M	L	H	1	1	1	1	9.72759	11.0638	0	13.5121	7.29011	10.874	7.35106	10.4342	17.0427	11.9371	9.98398	4.75956	9.20335	10.5128	6.07411	9.36077	9.3014	0	0	0	10.0855	6.01212	0	0	13.1232	0	0	10.7668	0	0	6.86692	6.03282	9.25369	0	8.14177
HL 080 IC11	3.4ODAD-V020	Edinburgh	ODAD	18	F	C	D	M	L	H	1	1	1	1	10.2182	11.3691	0	13.0152	8.48634	8.90654	8.05515	10.3142	13.8115	13.0558	6.00465	5.90449	9.73809	9.97587	7.51526	8.99651	9.90413	8.52158	7.64539	6.08867	10.598	0	0	0	13.0456	0	0	11.8761	0	0	9.26888	10.1089	8.42825	0	7.98734
HL 080 IC11	3.5MDAD-V009	Edinburgh	MDAD	18	F	C	D	M	L	H	1	1	1	1	10.2465	11.2531	0	13.4793	6.86041	10.6886	8.347	10.3084	14.3758	11.4054	6.06136	6.43101	9.43436	9.24419	8.4592	9.53008	8.81366	3.30311	0	0	10.6508	8.59492	0	0	12.7179	0	0	11.6769	0	0	9.05461	8.46231	8.77894	0	8.32747
HL 080 IC11	3.6ODAD-V019	Edinburgh	ODAD	18	F	C	D	M	L	H	1	1	1	1	10.078	11.026	0	13.135	7.26053	11.0361	7.60344	9.91138	13.4548	11.2232	4.76081	4.93996	8.96218	9.9092	8.74881	9.74565	8.82217	5.20906	0	0	10.118	7.75974	0	0	11.911	0	0	11.3505	0	0	9.08407	9.43336	7.84488	0	7.9543
HL 080 IC11	3.7ODAD-P029	Edinburgh	ODAD	18	F	C	D	M	L	H	1	1	1	1	11.1121	10.2684	0	12.1368	5.85014	12.6083	8.69271	9.89169	12.3543	10.1188	4.44517	3.52988	8.09383	3.38906	7.55819	8.81211	8.54744	0	0	0	8.8703	0	0	0	10.9334	0	0	9.01194	0	0	8.53816	9.03485	9.10629	4.39076	6.25827
HL 080 IC14	2.1EDAD-P045	Edinburgh	EDAD	19	F	C	D	M	E	H	0	0	1	1	10.236	11.3451	0	12.8937	8.06701	10.1932	7.74957	9.77274	13.0185	11.2262	0	8.63367	8.95693	10.3851	7.33956	9.93323	7.9304	7.01687	0	0	9.13425	10.3723	0	0	11.7229	4.79294	0	9.7581	0	0	10.266	0	6.60494	0	7.73112
HL 080 IC14	2.2EDAD-V028	Edinburgh	EDAD	19	F	C	D	M	E	H	0	0	1	1	10.3008	11.3736	0	12.933	8.35801	8.94031	8.83424	9.4623	12.8524	10.62	4.47629	8.9614	9.1825	10.3215	8.18646	9.71965	8.86637	7.84959	0	0	9.24764	10.6372	0	0	11.3363	4.73315	0	9.76741	1.65196	0	10.5913	8.71503	0	5.82617	8.34188
HL 080 IC14	2.3EDAD-P044	Edinburgh	EDAD	19	F	C	D	M	E	H	0	0	1	1	10.7752	11.6239	2.89677	12.6229	8.11931	9.1317	8.35469	10.1304	13.0967	10.747	0	8.25497	8.83805	10.3842	5.82813	9.50661	8.25068	7.64747	0	0	8.71471	10.5021	0	0	11.6136	0	0	9.08105	0	0	11.0294	6.81878	5.3477	0	6.41512
HL 080 IC14	2.4EDAD-P042	Edinburgh	EDAD	19	F	C	D	M	E	H	0	0	1	1	10.6692	11.6305	0	13.4037	8.2104	12.2712	8.5238	10.6947	14.0437	10.4545	5.34766	7.94472	9.17103	9.83877	8.46562	10.3902	10.2818	6.8399	0	0	9.3789	8.86871	0	0	11.7624	3.83306	0	8.97235	0	0	10.2356	8.8338	8.17978	0	7.92173
HL 080 IC14	2.5EDAD-P041	Edinburgh	EDAD	19	F	C	D	M	E	H	0	0	1	1	11.3905	11.3171	5.87125	13.5573	8.1087	12.8421	8.55114	11.5101	12.6729	10.3202	0	7.34658	8.59413	9.86728	6.58214	9.65634	10.6735	7.60138	4.03377	0	9.74534	7.95358	0	0	11.9002	5.12837	0	8.25398	0	0	10.22	9.14793	8.04266	0	7.84001
HL 080 IC14	2.6EDAD-P043	Edinburgh	EDAD	19	F	C	D	M	E	H	0	0	1	1	10.6276	11.5794	4.15061	13.2902	7.82786	11.3976	8.50033	10.5277	12.9706	10.2255	0	8.77365	8.67663	10.1045	7.37113	9.40763	9.06591	7.98207	0	0	9.15241	9.69238	0	0	11.427	4.85113	0	9.72389	0	0	10.5136	9.08047	6.7149	0	8.13212
HL 080 IC15	1.1EDAD-P050	Edinburgh	EDAD	20	F	C	D	M	E	H	0	1	1	1	10.3484	11.104	0	13.7065	8.57715	13.9485	8.7982	10.7891	13.1435	10.4252	0	6.99412	8.54766	8.66286	6.1796	8.58268	9.16825	7.04368	6.05675	0	10.3359	9.26476	0	0	11.7697	0	0	10.7393	0	0	8.64405	10.4337	8.14105	0	8.3824
HL 080 IC15	3.1EDAD-P049	Edinburgh	EDAD	20	F	C	D	M	E	H	0	1	1	1	11.0751	11.5741	0	13.7493	8.83905	14.0579	9.14163	11.0547	13.7504	10.9522	0	8.58892	9.04288	8.09202	5.70315	8.72567	9.05729	4.50286	0	0	10.3257	9.9189	0	0	12.1436	0	0	10.0189	0	0	10.2085	10.8721	7.60569	0	9.00388
HL 080 IC15	3.2ODAD-P031	Edinburgh	ODAD	20	F	C	D	M	E	H	0	1	1	1	11.5149	11.4376	0	13.6165	8.67069	14.3329	9.21047	10.5816	13.7414	11.0727	5.05039	8.43471	9.25975	8.86973	7.30958	8.7451	8.87836	6.35206	0	0	10.523	10.0709	0	0	11.9496	0	0	11.0652	0	0	9.2751	10.8319	7.41174	0	9.05818
HL 080 IC15	3.3EDAD-P046	Edinburgh	EDAD	20	F	C	D	M	E	H	0	1	1	1	10.4465	10.6477	0	13.5766	8.19284	13.6354	7.45759	10.9313	15.3027	11.7638	6.70105	7.41017	8.66664	8.17851	0	8.58148	10.5855	0	5.75208	0	9.37604	8.38508	0	0	11.7394	1.97071	0	9.57913	0	0	7.70287	10.2225	8.50324	0	8.86425
HL 080 IC15	3.4EDAD-V029	Edinburgh	EDAD	20	F	C	D	M	E	H	0	1	1	1	10.8413	11.4621	0	13.5049	9.03977	13.0788	8.15615	10.5854	15.4726	12.0054	5.18333	7.97032	9.56158	8.63811	6.82303	9.15671	8.11558	5.75544	6.45551	0	10.2751	10.2802	0	0	11.9929	0	0	10.9379	0	0	9.42157	10.8116	6.51224	0	9.25391
HL 080 IC15	3.5EDAD-P047	Edinburgh	EDAD	20	F	C	D	M	E	H	0	1	1	1	10.8495	11.6603	0	14.0445	8.81525	13.2119	9.36677	11.0696	14.4122	12.0135	7.30138	9.35413	9.65795	10.1966	4.37277	9.30142	10.6372	8.21649	8.36966	0	11.1806	10.0405	0	0	13.2113	8.1588	0	10.8872	0	0	9.76981	10.7938	8.75339	0	9.29156
HL 080 IC15	3.6EDAD-P048	Edinburgh	EDAD	20	F	C	D	M	E	H	0	1	1	1	10.3507	11.2033	0	14.2571	8.69946	12.7177	7.49637	10.4111	15.9014	12.379	6.0803	8.17985	9.96247	10.6544	4.84629	8.94618	9.57537	7.27948	7.75625	0	11.3759	8.72636	0	0	12.9716	7.16367	0	10.4945	0	0	8.43121	10.0906	7.28499	0	9.60119
MPM20-10 A6	006EDAD-V045	Imperial	EDAD	21	F	C	B	F	E	H	1	1	1	6	7.9415	9.07161	0	12.5425	7.07305	11.4749	6.29796	9.29243	13.274	10.5453	6.25292	3.97764	0	0	0	8.20769	0	0	0	10.6164	6.24823	5.38355	0	0	10.5386	5.84422	0	9.48967	0	0	8.21355	0	4.63346	0	6.78851
MPM20-10 A6	007EDAD-P090	Imperial	EDAD	21	F	C	B	F	E	H	1	1	1	6	7.89982	8.52668	0	12.4779	7.30722	10.9592	5.36781	9.28152	13.1241	10.3859	5.04493	0	0	0	0	8.54435	0	0	0	11.2826	6.08017	5.67159	0	0	9.72978	5.42462	0	9.03862	0	0	8.75865	0	5.69439	0	6.68877
MPM20-10 A6	008EDAD-P089	Imperial	EDAD	21	F	C	B	F	E	H	1	1	1	6	8.52625	9.09653	0	12.5831	7.62992	11.075	5.9908	9.75557	13.3891	10.3298	5.76429	5.05384	4.79731	0	0	8.31647	0	0	0	11.4772	6.98337	5.95172	0	0	9.79561	6.28173	0	9.42913	0	0	8.70776	5.32479	5.75953	0	7.34808
MPM20-10 A6	009EDAD-P088	Imperial	EDAD	21	F	C	B	F	E	H	1	1	1	6	8.11299	9.03995	0	12.6129	7.88443	11.5011	4.53196	9.43439	12.6178	10.379	5.05434	5.69796	0	0	0	8.76612	0	0	0	10.9179	7.41433	5.26233	0	0	9.58578	5.15454	0	9.38897	0	0	9.40979	0	6.83986	0	7.38735
MPM20-10 A6	010EDAD-P091	Imperial	EDAD	21	F	C	B	F	E	H	1	1	1	6	8.30253	9.40405	0	12.8134	7.89342	11.6253	6.83554	9.89286	12.1638	10.7598	4.64424	3.48943	4.81291	4.94015	0	8.98032	0	0	0	10.3744	6.9859	7.39647	0	0	10.0721	6.81641	0	9.12559	0	0	9.14897	0	6.27463	0	7.6546
MPM20-3-A5	ODAD-P004	Imperial	ODAD	22	F	B	C	M	L	H	1	1	U	6	12.1974	11.3493	0	14.0718	6.86296	11.3737	8.31005	8.65152	13.5664	10.3254	5.89275	0	8.06566	0	0	8.34637	0	0	0	0	9.92385	7.95446	0	0	13.6908	0	0	0	1.44115	6.35031	10.4566	11.4332	0	0	0
MPM20-3-A5	ODAD-P007	Imperial	ODAD	22	F	B	C	M	L	H	1	1	U	6	11.871	10.4993	0	13.9634	4.81077	12.3078	6.85641	8.87747	13.5427	9.80677	5.08552	0	7.30965	0	0	8.28841	0	0	0	0	8.96433	8.26885	0	0	12.4138	0	0	0	0	0	10.1128	11.6718	0	0	0
MPM20-3-A5	ODAD-V003	Imperial	ODAD	22	F	B	C	M	L	H	1	1	U	6	11.9564	10.5271	0	14.1044	7.19622	11.9826	7.31776	8.64442	14.4597	10.1612	5.26722	0	7.57522	0	0	8.29587	0	0	0	0	9.11252	8.35292	0	0	12.5676	0	0	0	0	0	10.1377	11.9503	0	0	0
MPM20-3-A5	ODAD-V004	Imperial	ODAD	22	F	B	C	M	L	H	1	1	U	6	11.9572	10.9246	0	14.0848	6.16314	11.9472	7.70794	8.61853	13.9001	10.2701	4.88219	0	7.88561	0	0	8.47547	0	0	0	0	9.77486	7.64363	0	0	13.1117	0	0	0	0	0	10.6111	11.6689	0	0	0
MPM20-3-A5	ODAD-V005	Imperial	ODAD	22	F	B	C	M	L	H	1	1	U	6	11.588	10.5834	0	13.8399	6.62464	11.6977	7.41953	8.27717	13.9808	9.67595	0	0	7.36516	0	0	8.20523	0	0	0	0	9.36449	9.00613	0	0	12.5873	3.6562	0	0	0	0	10.2796	11.4926	0	0	0
MPM20-3-A5	ODAD-V006	Imperial	ODAD	22	F	B	C	M	L	H	1	1	U	6	11.8856	10.2171	0	13.7167	5.39447	11.9863	6.46569	8.52808	12.8317	9.89601	3.68338	0	6.78214	0	0	7.83467	0	0	0	0	8.60458	8.53905	0	0	12.328	0	0	0	0	0	9.69462	11.2387	0	0	0
MPM20-3-A5	ODAO-P005	Imperial	ODAD	22	F	B	C	M	L	H	1	1	U	6	11.9361	11.3218	0	14.0248	5.95772	11.6154	8.20503	8.69981	13.6903	10.1756	4.26321	0	7.90558	0	0	8.39333	0	0	0	0	9.68515	8.93825	0	0	13.4522	0	0	0	0	0	10.5348	11.3194	0	0	0
MPM20-4-A5	EDAD_P011	Imperial	EDAD	23	F	B	D	M	L	C	0	1	1	5	10.9986	12.1317	0	14.2262	8.22796	11.3126	9.80125	8.00395	13.5601	8.03312	6.04283	7.62911	9.28767	9.5527	0	9.38736	9.8847	8.23671	0	3.24256	10.782	0	0	0	13.3581	7.60982	0	9.68488	0	0	11.2927	11.2504	8.08279	0	9.45613
MPM20-4-A5	EDAD-008	Imperial	EDAD	23	F	B	D	M	L	C	0	1	1	5	11.3814	11.6694	0	14.4948	8.52875	11.3144	8.47532	8.26726	15.1115	8.96016	0	0	8.77817	10.1894	0	10.0815	10.4106	6.43023	0	0	10.7841	0	0	0	13.5625	9.85268	0	10.052	6.7454	0	11.8201	11.0369	9.20768	5.71628	9.88578
MPM20-4-A5	EDAD-P010	Imperial	EDAD	23	F	B	D	M	L	C	0	1	1	5	11.3997	11.6094	0	14.0501	8.55588	11.408	9.31059	7.05205	13.5966	8.19118	1.5648	6.25517	8.73473	9.16562	0	9.92131	9.42689	6.20314	0	0	10.7276	0	0	0	12.9703	8.21158	0	10.2182	5.92314	0	11.6921	11.0631	7.76371	0	9.52736
MPM20-4-A5	EDAD-P012	Imperial	EDAD	23	F	B	D	M	L	C	0	1	1	5	11.2214	11.9554	0	14.6552	9.38653	12.1152	9.67151	8.09954	13.971	9.00972	0	7.03304	9.28297	9.38436	0	9.87265	9.04264	7.17118	0	0	11.3308	0	0	0	13.6994	7.92478	0	10.3274	5.60119	0	11.6022	11.5439	8.14165	0	9.50844
MPM20-4-A5	EDAD-P013	Imperial	EDAD	23	F	B	D	M	L	C	0	1	1	5	11.4498	11.7047	0	13.7638	8.90265	11.6447	9.41069	7.7354	13.4261	7.38375	3.98695	6.97732	9.04011	8.93505	0	9.95403	8.93746	6.44782	0	0	10.4551	2.21962	0	6.90709	12.5143	7.9295	0	10.3805	7.71326	0	11.8668	11.6711	6.0239	5.30164	9.61244
MPM20-4-A5	EDAD-P014	Imperial	EDAD	23	F	B	D	M	L	C	0	1	1	5	10.0305	12.0709	0	14.5472	8.45018	11.9634	9.60771	8.28924	14.0702	8.20055	0	7.8439	8.7779	10.7423	0	9.58448	9.79677	8.23916	0	0	10.9426	0	0	0	13.6151	4.91252	0	10.2112	7.2789	0	11.0421	9.6998	9.10285	0	9.47592
MPM20-4-A5	EDAD-V009	Imperial	EDAD	23	F	B	D	M	L	C	0	1	1	5	11.5598	11.6258	0	14.097	8.79473	10.9706	10.1505	9.52383	15.7699	10.1788	7.2062	6.20661	9.20843	9.222	0	9.82237	10.3616	7.2043	6.40572	0	11.3446	0	0	0	13.649	8.93485	0	10.5901	7.37135	0	11.8056	11.0101	9.3577	5.66967	9.90874
MPM20-4-A5	EDAD-V010	Imperial	EDAD	23	F	B	D	M	L	C	0	1	1	5	10.9706	12.1889	0	14.5121	8.83255	11.663	9.11027	8.96218	14.978	9.09613	6.51548	7.16188	9.07713	9.84954	0	8.80915	10.3098	6.90675	0	0	10.899	6.91666	0	0	13.2807	8.1303	0	10.4825	2.01989	0	11.5618	10.8024	9.09843	0	9.63973
MPM20-4-A5	MDAD-V004	Imperial	MDAD	23	F	B	D	M	L	C	0	1	1	5	10.3525	11.4268	0	14.3079	8.37707	11.5065	8.73812	7.20888	14.7259	7.95413	5.181	6.34834	8.88188	9.36745	0	9.69468	9.71118	0	0	0	11.3352	6.56304	0	0	13.2851	7.97289	0	10.8276	6.30331	0	11.3552	9.85436	8.35093	0	9.59141
MPM20-4-A5	ODAD-P008	Imperial	ODAD	23	F	B	D	M	L	C	0	1	1	5	11.3166	11.7874	0	14.067	8.64168	11.928	9.25832	8.7117	13.9002	7.7021	5.80946	6.78118	8.97394	9.50008	0	9.72703	9.10064	0	0	0	10.9451	3.36737	0	0	13.032	7.05632	0	10.457	5.96378	0	11.407	10.9548	7.36639	0	9.70914
MPM20-5-A5	EDAD-P015	Imperial	EDAD	24	F	B	B	M	E	H	0	0	0	5	10.5477	12.3207	0	15.4079	9.92762	13.6545	9.93059	10.437	16.1124	11.425	0	9.0601	10.0829	7.96724	0	10.5309	9.00858	8.51129	9.47536	8.46486	11.575	12.3224	4.76828	3.62063	13.9427	10.5035	0	11.6133	7.70848	0	12.4597	9.79601	6.44867	6.69499	9.42114
MPM20-5-A5	EDAD-P016	Imperial	EDAD	24	F	B	B	M	E	H	0	0	0	5	10.7438	11.9779	0	15.7671	9.38797	14.7283	9.66005	10.2134	15.5418	10.981	6.45459	8.16935	9.91531	8.76347	0	10.4873	9.25536	8.67984	7.41683	7.70503	11.4637	12.0541	6.16873	7.52172	13.6431	10.2731	0	11.2915	5.5855	0	12.098	10.4232	7.29487	7.44874	9.85151
MPM20-5-A5	EDAD-P017	Imperial	EDAD	24	F	B	B	M	E	H	0	0	0	5	10.8105	12.3092	0	14.6893	9.49506	12.0983	8.87749	9.75229	13.7523	7.84522	5.29365	9.37639	9.92464	9.30547	0	9.82701	6.92158	7.63011	2.3581	3.6984	9.62737	12.8237	0	3.31323	13.0371	9.00733	6.69933	9.68863	6.26612	0	11.1308	11.14	0	0	8.92258
MPM20-5-A5	EDAD-P018	Imperial	EDAD	24	F	B	B	M	E	H	0	0	0	5	10.4116	12.1925	0	15.3665	9.89521	12.9243	9.641	9.92488	15.8689	9.88446	6.14741	8.63446	9.91057	9.14425	0	10.0462	8.05256	7.9447	8.46475	7.47205	11.2937	12.8629	2.86799	0	13.6963	10.3351	6.93533	11.3311	3.29312	0	11.626	10.6467	5.92462	4.57267	10.1338
MPM20-5-A5	EDAD-P019	Imperial	EDAD	24	F	B	B	M	E	H	0	0	0	5	10.0279	11.6599	0	14.9731	7.76347	13.7352	8.80909	9.29712	14.1783	8.65519	0	5.6037	8.55805	7.22399	0	10.3862	0	0	0	1.17845	9.9088	11.4681	0	6.99703	12.7117	8.87993	0	8.77038	6.6528	0	11.5709	9.20464	0	0	8.86519
MPM20-5-A5	EDAD-V011	Imperial	EDAD	24	F	B	B	M	E	H	0	0	0	5	10.4265	12.0291	0	14.816	8.15526	13.3825	10.3097	9.98011	15.2066	10.4383	0	7.71696	9.25703	7.10604	0	10.3402	0	7.75658	0	7.17652	10.6695	11.6668	0	6.00278	13.3447	8.74781	0	9.7792	7.07273	0	12.0993	8.56059	0	2.78231	8.8949
MPM20-5-A5	EDAD-V012	Imperial	EDAD	24	F	B	B	M	E	H	0	0	0	5	9.65097	11.496	0	14.6773	7.7137	12.7602	9.1423	9.20724	15.8696	10.2761	5.70122	0	8.99202	6.97357	0	9.2262	6.94989	6.78254	5.03572	5.40476	10.3322	11.4161	0	0	13.0751	8.84854	0	9.67679	0	0	11.3541	8.93462	0	0	8.54613
MPM20-5-A5	EDAD-V013	Imperial	EDAD	24	F	B	B	M	E	H	0	0	0	5	10.3151	11.4397	0	14.7268	8.33697	13.8493	9.30881	9.62182	13.7403	8.71017	0	6.89375	8.86132	6.88666	0	9.96027	0	0	0	8.19607	10.1927	11.5655	0	6.34175	12.6266	8.89496	0	9.15298	7.02627	0	11.0735	9.68436	0	4.43215	8.68621
MPM20-5-A5	EDAD-V014	Imperial	EDAD	24	F	B	B	M	E	H	0	0	0	5	9.79308	11.1118	0	14.9613	8.06891	14.0875	8.64934	8.41672	15.1287	9.32299	0	7.1541	8.22145	6.84442	0	10.0783	0	0	0	6.42868	10.2613	11.6537	0	0	12.7746	8.53927	0	9.30803	5.49854	0	11.2341	8.56328	0	0	8.89488
MPM20-6-A4	EDAD-P020	Imperial	EDAD	25	F	B	A	M	E	H	0	1	0	7	10.4546	10.2306	0	12.2998	8.58916	11.6942	5.14587	9.3414	12.9104	6.78973	0	8.58388	5.20164	0	0	8.42618	2.31655	6.50532	0	0	7.91075	11.1989	0	0	10.5447	0	0	7.21659	0	0	10.6317	0	0	0	4.74502
MPM20-6-A4	EDAD-P021	Imperial	EDAD	25	F	B	A	M	E	H	0	1	0	7	10.2018	10.426	0	12.3579	8.71323	11.267	5.71859	9.55047	12.4192	7.44849	0	8.20457	6.87267	0	0	8.90827	4.55973	6.92015	0	0	7.38685	11.0463	0	0	10.566	0.932212	0	5.91999	0	0	10.515	0	0	0	0
MPM20-6-A4	EDAD-P022	Imperial	EDAD	25	F	B	A	M	E	H	0	1	0	7	10.3972	10.2187	0	12.3465	8.54816	11.5864	5.08565	9.53478	11.9272	6.64305	5.44118	7.89784	6.67128	2.92591	0	8.76913	6.46077	5.3713	0	0	7.62594	11.3213	0	0	10.5682	5.18495	0	7.7571	0	0	10.4428	0	0	0	0
MPM20-6-A4	EDAD-P023	Imperial	EDAD	25	F	B	A	M	E	H	0	1	0	7	9.60258	9.84812	0	12.17	8.46765	11.438	0	8.21069	12.6733	7.44193	0	8.29332	6.20855	5.72067	0	7.96675	5.63252	4.93173	0	6.7226	7.28806	11.1778	0	0	10.0482	5.47854	0	5.48413	0	0	10.2094	0	0	0	0
MPM20-6-A4	EDAD-P024	Imperial	EDAD	25	F	B	A	M	E	H	0	1	0	7	10.2615	10.1803	0	12.2816	8.51366	11.4029	3.76217	9.31985	13.1942	6.27054	5.66041	8.30715	6.54827	5.23809	0	7.94114	7.89476	5.90224	0	5.26077	7.42294	11.155	0	0	10.408	5.75805	0	7.10605	0	0	10.4926	0	0	0	0
MPM20-6-A4	EDAD-P025	Imperial	EDAD	25	F	B	A	M	E	H	0	1	0	7	10.4618	10.5233	0	12.7107	9.22965	11.784	5.01393	9.44534	13.8109	7.82132	0	9.58617	6.54602	0	0	8.49712	7.24048	6.58341	0	5.60071	8.59405	11.5699	0	0	10.9937	6.59846	0	7.85769	0	0	10.7775	0	0	0	3.85307
MPM20-6-A4	EDAD-V015	Imperial	EDAD	25	F	B	A	M	E	H	0	1	0	7	10.3411	10.2396	0	12.6126	8.7334	12.1383	5.88423	9.97994	14.0887	7.42038	4.27351	8.0883	6.08339	0	0	9.19779	6.19676	0	0	0	8.20432	11.6549	0	0	10.9937	4.24797	0	9.47824	0	0	10.5298	0	0	0	7.07487
MPM20-6-A4	EDAD-V016	Imperial	EDAD	25	F	B	A	M	E	H	0	1	0	7	10.0085	10.252	0	12.2524	8.37455	11.4243	0	9.38135	15.0457	6.4666	0	7.69771	5.65013	0	0	9.01605	0	4.48217	0	0	6.80514	11.2754	0	0	10.501	0	0	8.95496	0	0	10.2161	0	0	0	5.036
MPM20-8-A13	EDAD-V017	Imperial	EDAD	26	F	C	C	F	L	H	0	1	1	9	10.5201	11.9302	0	14.5042	9.89736	12.382	7.91618	9.25237	13.4365	8.76421	5.97593	8.85593	9.28506	9.09058	0	9.35427	8.97093	8.87985	6.32031	4.56969	10.2047	12.0278	0	0	12.0208	8.06913	0	9.37705	0	0	11.0898	10.3193	5.89004	0	8.32281
MPM20-8-A13	EDAD-V018	Imperial	EDAD	26	F	C	C	F	L	H	0	1	1	9	10.7198	11.7715	0	14.9502	10.196	12.7245	7.514	9.79235	16.7686	10.1207	0	8.15577	9.6836	9.81397	0	9.68302	8.81167	6.95151	7.58614	0	11.0756	11.3287	0	0	12.5517	7.50804	0	10.4293	0	0	11.7986	10.6304	6.0231	0	8.09636
MPM20-8-A13	EDAD-V019	Imperial	EDAD	26	F	C	C	F	L	H	0	1	1	9	10.3879	11.5183	0	14.4499	9.56783	12.7439	7.48021	9.2073	14.2935	8.87934	0	7.07696	9.09912	9.3332	0	9.51609	8.65564	8.64906	1.06948	0	10.6534	11.3758	0	0	12.1485	6.62434	0	11.3356	0	0	11.5102	10.7914	7.51457	0	8.75437
MPM20-8-A13	MADA-P003	Imperial	MDAD	26	F	C	C	F	L	H	0	1	1	9	10.9655	12.1038	0	14.9402	10.743	12.4607	7.49732	10.2016	14.4422	10.5464	7.06807	8.83892	10.5746	9.63581	0	10.4239	9.48141	9.37479	8.24079	0	11.3651	10.89	0	0	12.9501	8.69113	0	11.7581	0	0	11.9171	12.0625	8.58963	5.36261	10.3797
MPM20-9-A13	MDAD-P004	Imperial	MDAD	27	F	B	B	M	E	H	0	1	1	7	11.4672	10.1661	0	13.4348	5.95287	11.8118	8.07823	8.22999	11.966	10.466	0	0	5.57499	0	0	8.20728	0	0	0	9.90863	9.7258	0	0	5.9466	13.6325	7.21739	5.14104	0	7.18825	5.89533	10.5473	11.3728	0	0	8.24238
MPM20-9-A13	MDAD-V005	Imperial	MDAD	27	F	B	B	M	E	H	0	1	1	7	10.8609	10.1609	0	13.3135	6.54863	11.7964	7.45212	8.20057	13.8469	10.3998	0	0	5.75874	0	0	8.73281	0	0	0	9.90661	9.95771	0	0	0	13.2867	7.1301	0	0	6.39842	2.92876	10.4733	10.9981	0	0	8.44974
MPM20-9-A13	ODAD-V007	Imperial	ODAD	27	F	B	B	M	E	H	0	1	1	7	10.8756	9.86974	0	13.3306	6.83082	10.4256	6.49082	7.69504	13.2964	9.88428	0	0	5.96097	0	0	8.43995	0	0	0	9.65163	9.38581	0	0	0	13.1505	6.76638	0	0	6.5378	0	10.4059	11.3341	0	0	7.9239
[truncated: 5 more columns]

## Sheet: DSP panel 
Used in analysis
CD68
CD45
PD-L1
S6
Beta-2-microglobulin
PanCk
CD11c
HLA-DR
SMA
Fibronectin
CD56
GZMB
CD4
Ki-67
CD3
CD8
STING
VISTA
Tim-3
ARG1
B7-H3
IDO1
CD25
ICOS
CD44
CD127
CD40
CD34
FAP-alpha
CD45RO
CD14
CD163
Pan-AKT
INPP4B
Phospho-PRAS40 (T246)
p44/42 MAPK ERK1/2
EGFR
Phospho-p44/42 MAPK ERK1/2 (T202/Y204)
pan-RAS
Phospho-p90 RSK(T359/S363)
Isotypes / houskeepers
Rb IgG
Ms IgG1
Ms IgG2a
GAPDH
Histone H3
Not detectable / failed QC
PD-1
CTLA4
CD20
LAG3
OX40L
GITR
4-1BB
CD80
CD27
PD-L2
CD66b
FOXP3
Phospho-AKT1 (S473)
MET
Phospho-Tuberin (T1462)
Phospho-GSK3B (S9)
PLCG1
Phospho-GSK3A (S21)/Phospho-GSK3B (S9)
BRAF
Phospho-JNK (T183/Y185)
Phospho-p38 MAPK (T180/Y182)
Phospho-MEK1 (S217/S221)
Phospho-c-RAF (S338)
